# Supplementary material for: Enhanced visible light photocatalytic degradation of Rhodamine B by Bi/Bi2MoO6 hollow microsphere composites
Source: Royal Society of Chemistry journal article supplement (doi:10.1039/c4ra09830g), 2014-11-13
Supplement: c4ra09830g1.pdf [file c4ra09830g1.pdf]

# Enhanced visible light photocatalytic degradation of Rhodamine B by Bi/Bi<sub>2</sub>MoO<sub>6</sub> hollow microsphere composites

Jinliang Li<sup>a</sup>, Xinjuan Liu<sup>\*b</sup>, Likun Pan<sup>\*a</sup>, Wei Qin<sup>a</sup>, and Zhuo Sun<sup>a</sup>

<sup>a</sup>Engineering Research Center for Nanophotonics & Advanced Instrument, Ministry of Education, Shanghai Key Laboratory of Magnetic Resonance, Department of Physics, East China Normal University, Shanghai 200062 China, Fax: +86 21 62234321; Tel: +86 21 62234132; E-mail: lkpan@phy.ecnu.edu.cn

<sup>b</sup>Center for Coordination Bond and Electronic Engineering, College of Materials Science and Engineering, China Jiliang University, Hangzhou 310018, China; E-mail: lxj669635@126.com

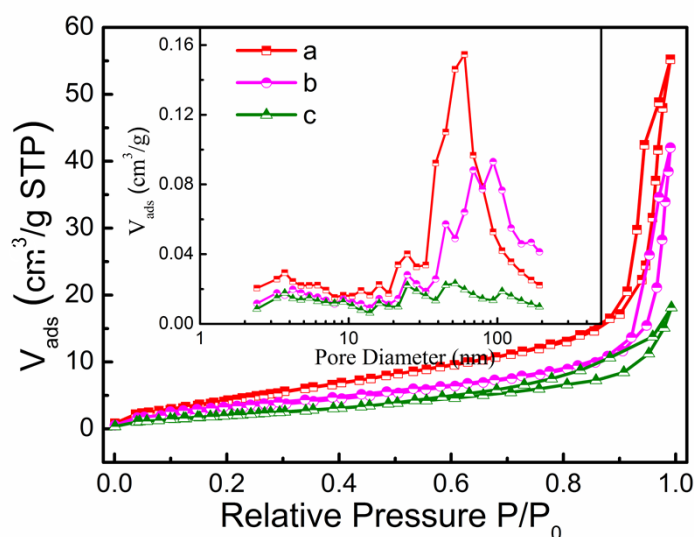

**Fig. S1** Nitrogen adsorption-desorption isotherms and corresponding pore size distribution curves (inset) of (a)BMO-1, (b)BMO-3 and (c)BMO-4.

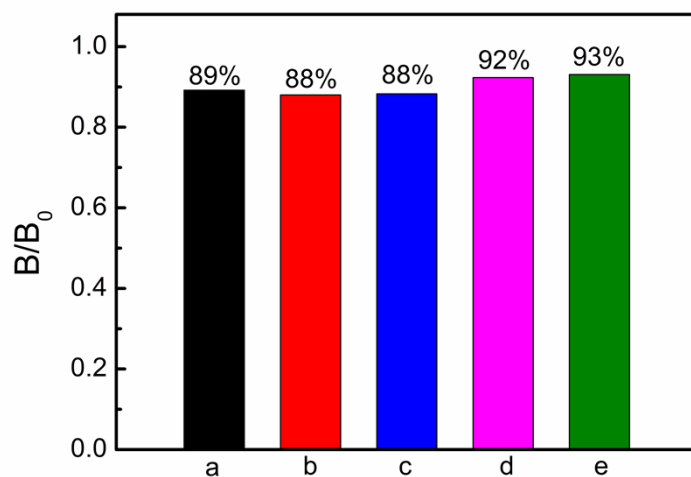

**Fig. S2** Bar plot showing the remaining RhB in the solution after reaching the adsorption equilibrium in the dark by using (a)  $\text{Bi}_2\text{MoO}_6$ , (b) BMO-1, (c) BMO-2, (d) BMO-3 and (e) BMO-4 in 30 min.

Fig. S2 shows the result of RhB adsorption experiments. The normalized temporal concentration changes ( $B/B_0$ ) of RhB during the adsorption process are proportional to the normalized maximum absorbance ( $A/A_0$ ), which can be derived from the change in the RhB absorption profile during the adsorption process.
